# Supplementary material for: Stiff metal–organic framework–polyacrylonitrile hollow fiber composite membranes with high gas permeability
Source: Royal Society of Chemistry journal article supplement (doi:10.1039/c3ta13781c), 2013-11-13
Supplement: c3ta13781c.pdf [file c3ta13781c.pdf]

## Supporting Information

### **Stiff metal-organic framework/polyacrylonitrile hollow fiber composite membranes with high gas permeability**

Wanbin Li,<sup>a</sup> Zhihong Yang,<sup>a</sup> Guoliang Zhang,<sup>a\*</sup> Zheng Fan,<sup>a</sup> Qin Meng,<sup>b\*</sup>

Chong Shen<sup>b</sup> and Congjie Gao<sup>a</sup>

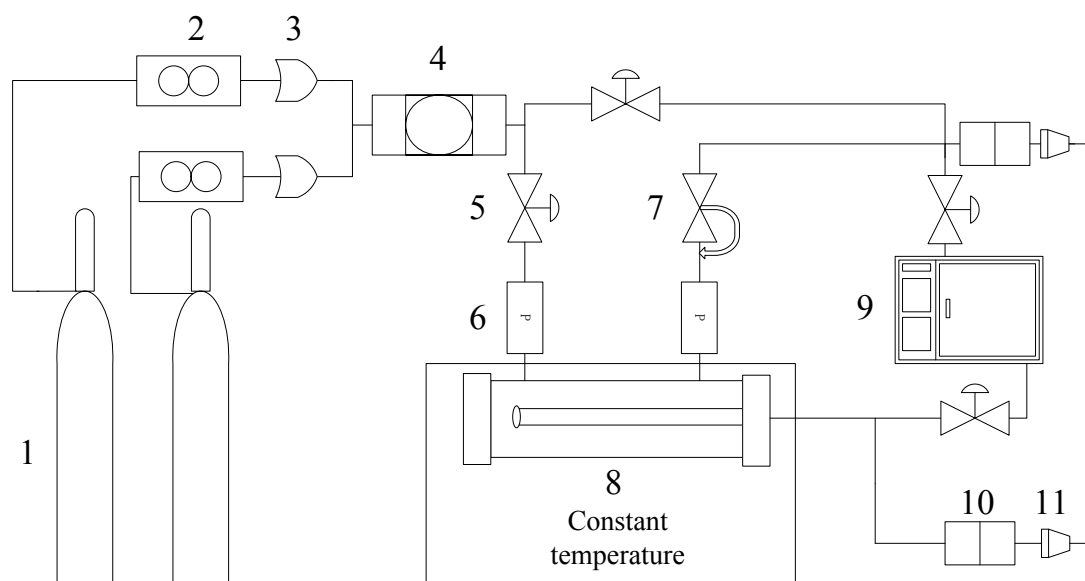

**Fig. S1.** The experimental setup for both single and mixed gas permeation. (1) Feed gas cylinder, (2) mass flow controller, (3) non-return valve, (4) gas mixer, (5) shut-down valve, (6) pressure gauge, (7) back pressure regulator, (8) permeation cell, (9) gas chromatograph, (10) soap bubble film flow meter, (11) exhaust head.

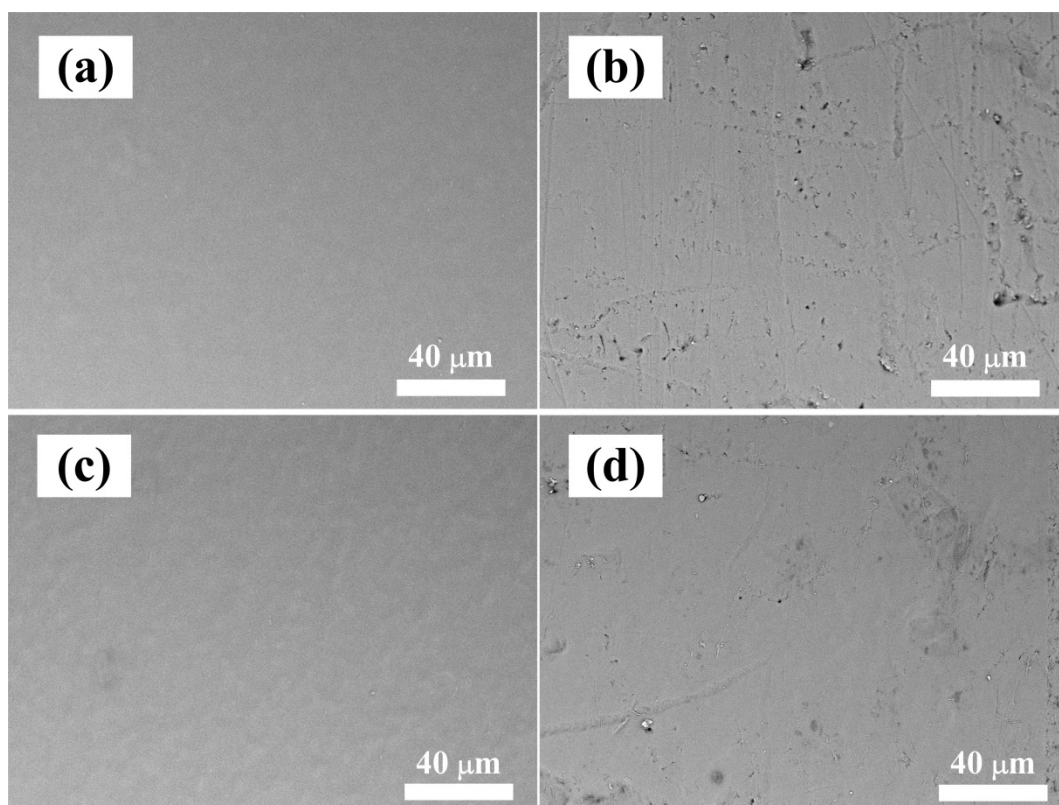

**Fig. S2.** SEM images of inner and outer surface of the PAN hollow fiber: (a), (b) inner and outer surface of the original PAN hollow fiber; (c), (d) inner and outer surface of the hydrolyzed PAN hollow fiber.

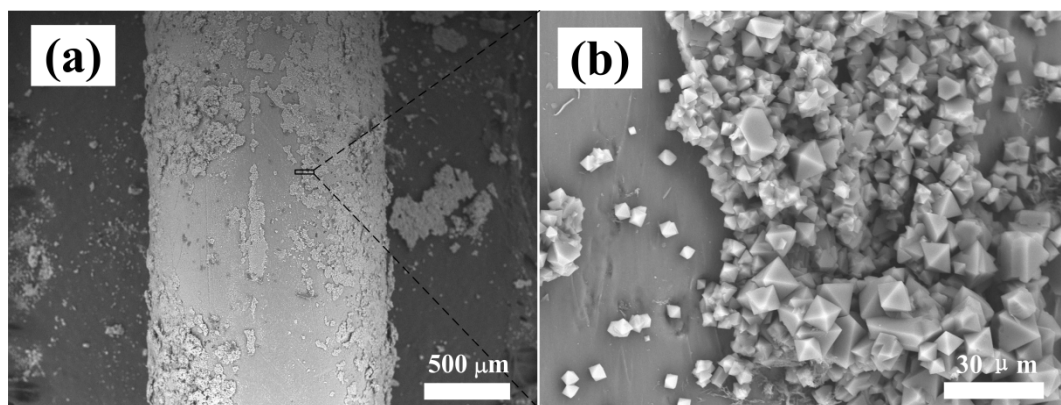

**Fig. S3.** The low and high magnification SEM images of  $\text{Cu}_3(\text{BTC})_2$  membrane supported by original PAN hollow fiber.

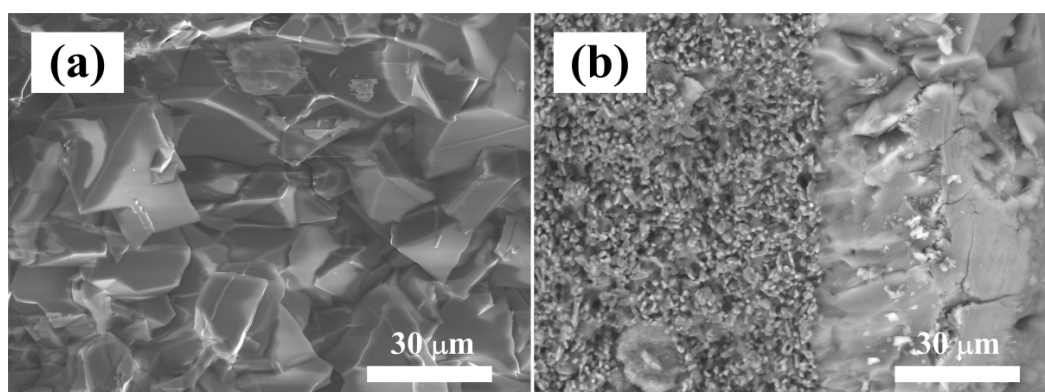

**Fig. S4.** SEM images of the  $\text{Cu}_3(\text{BTC})_2$  membrane supported by ceramic substrate: (a) outer surface, (b) cross-section.

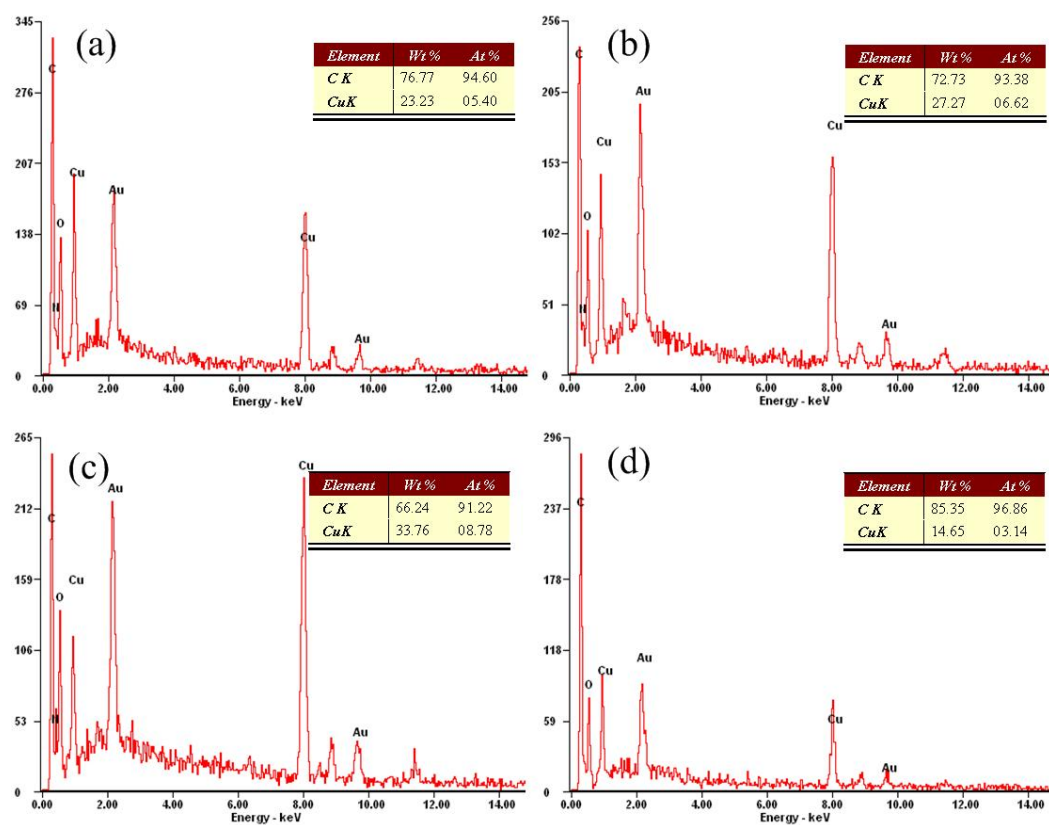

**Fig. S5.** EDS spectra of the PAN hollow fiber substrates with fixed copper ion; (a), (b), (c), (d) the substrates hydrolyzed by NaOH for 15min, 60min, 120min and 60min follow by acidized with hydrochloric acid.

**Tab. S1.** The effect of modified conditions on separation performance.

| Membrane | H <sub>2</sub> permeance<br>$\times 10^{-5}$ mol/(m <sup>2</sup> ·s·Pa) | CO <sub>2</sub> permeance<br>$\times 10^{-5}$<br>mol/(m <sup>2</sup> ·s·Pa) | Ideal separation factor |
|----------|-------------------------------------------------------------------------|-----------------------------------------------------------------------------|-------------------------|
| M1       | 0.347                                                                   | 0.064                                                                       | 5.42                    |
| M2       | 9.63                                                                    | 1.72                                                                        | 5.60                    |
| M3       | 53.6                                                                    | 15.6                                                                        | 3.44                    |
| M4       | 0.922                                                                   | 0.211                                                                       | 4.38                    |
| M5       | 0.038                                                                   | 0.006                                                                       | 5.50                    |

Notes: M1, M2, M3, Cu<sub>3</sub>(BTC)<sub>2</sub>/PAN supported by the PAN hollow fiber substrate hydrolyzed by NaOH for 15min, 60min, 120min, respectively; M4, Cu<sub>3</sub>(BTC)<sub>2</sub>/PAN supported by the PAN hollow fiber substrate hydrolyzed for 60min and then acidized by hydrochloric acid; M5, Cu<sub>3</sub>(BTC)<sub>2</sub> membrane supported by ceramic substrate.

**Tab. S2.** Mixture gas permeances and separation factors of the  $\text{Cu}_3(\text{BTC})_2/\text{PAN}$  HFM at different retentate flux and pressure.

| Retentate flow<br>rate<br>(ml/min) | Pressure | Permeate flow<br>rate<br>(ml/min) | Permeance<br>( $10^{-5}\text{mol}/(\text{m}^2\cdot\text{s}\cdot\text{Pa})$ ) |                 | $y_{\text{H}_2}/y_{\text{CO}_2}$ | Separation<br>factor |
|------------------------------------|----------|-----------------------------------|------------------------------------------------------------------------------|-----------------|----------------------------------|----------------------|
|                                    |          |                                   | H <sub>2</sub>                                                               | CO <sub>2</sub> |                                  |                      |
|                                    |          |                                   |                                                                              |                 |                                  |                      |
| 200                                | 0.05     | 94.07                             | 6.46                                                                         | 1.18            | 5.46                             | 10.98                |
|                                    | 0.1      | 164.84                            | 5.3                                                                          | 1.39            | 3.82                             | 10.94                |
|                                    | 0.15     | 272.73                            | 4.89                                                                         | 1.73            | 2.82                             | 9.91                 |
|                                    | 0.2      | 361.26                            | 4.86                                                                         | 2.47            | 1.97                             | 7.74                 |
|                                    | 0.25     | 469.36                            | 4.81                                                                         | 2.81            | 1.71                             | 7.21                 |
| 458                                | 0.05     | 99.64                             | 6.85                                                                         | 1.25            | 5.50                             | 7.34                 |
|                                    | 0.1      | 183.39                            | 6.03                                                                         | 1.42            | 4.25                             | 7.08                 |
|                                    | 0.15     | 291.38                            | 6.02                                                                         | 1.86            | 3.24                             | 6.58                 |
|                                    | 0.2      | 373.44                            | 5.56                                                                         | 2.02            | 2.75                             | 6.03                 |
|                                    | 0.25     | 484.52                            | 5.49                                                                         | 2.38            | 2.30                             | 5.85                 |
| 847                                | 0.05     | 101.22                            | 7.05                                                                         | 1.17            | 6.01                             | 7.14                 |
|                                    | 0.1      | 191.59                            | 6.52                                                                         | 1.26            | 5.16                             | 7.05                 |
|                                    | 0.15     | 298.63                            | 6.51                                                                         | 1.58            | 4.13                             | 6.29                 |
|                                    | 0.2      | 387.10                            | 6.11                                                                         | 1.75            | 3.48                             | 5.83                 |
|                                    | 0.25     | 497.24                            | 6.08                                                                         | 2.00            | 3.04                             | 5.68                 |





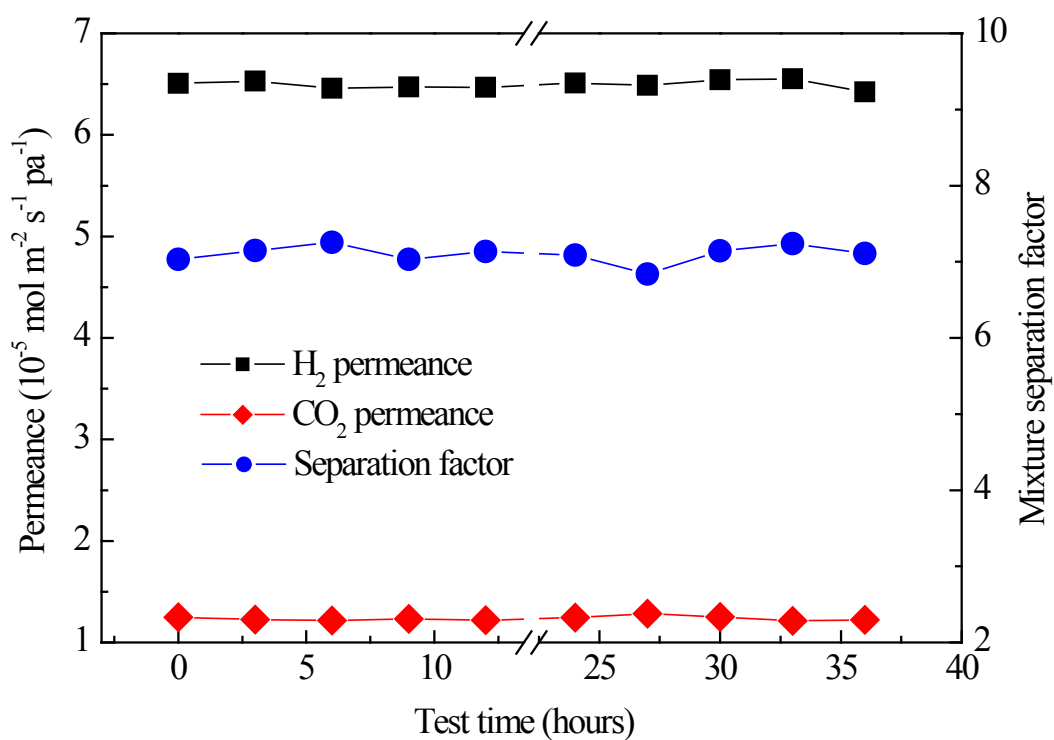

**Fig. S6.** Mixture gas permeances and separation factor of  $\text{Cu}_3(\text{BTC})_2/\text{PAN}$  HFM as function of test time at 0.1 MPa and 20 °C with retentate side flow rate of 847 ml/min.

**Tab. S3.** Comparison of mixture gas separation performance of the  $\text{Cu}_3(\text{BTC})_2/\text{PAN}$  HFM in this study with other membranes in the literature for equimolar  $\text{H}_2/\text{CO}_2$  mixture.

| Membrane                    | Reference | T(°C) | Pore size (nm) | Separation factor | $\text{H}_2$ permeance ( $\text{molm}^{-2}\text{s}^{-1}\text{Pa}^{-1}$ ) |
|-----------------------------|-----------|-------|----------------|-------------------|--------------------------------------------------------------------------|
| zeolite P/NaX               | 1S        | 16    | 0.74           | 4.50              | $1.40 \times 10^{-7}$                                                    |
| silicate-1                  | 2S        | 25    | 0.55           | 1.84              | $7.90 \times 10^{-6}$                                                    |
| SAPO-34                     | 3S        | 27    | 0.38           | 1.30              | $3.00 \times 10^{-8}$                                                    |
| Matrix $\text{AlPO}_4$      | 4S        | 35    | -              | 9.70              | $1.10 \times 10^{-7}$                                                    |
| LTA $\text{AlPO}_4$         | 5S        | 20    | 0.40           | 7.60              | $2.10 \times 10^{-7}$                                                    |
| SSZ-13                      | 6S        | 25    | 0.38           | 1.60              | $3.10 \times 10^{-7}$                                                    |
| MFI                         | 7S        | 450   | 0.56           | 17.5              | $1.86 \times 10^{-7}$                                                    |
| MMM ZIF-8                   | 7b        | 180   | -              | 7.70              | $6.77 \times 10^{-8}$                                                    |
| ZIF-7                       | 8S        | 200   | 0.29           | 6.48              | $7.71 \times 10^{-8}$                                                    |
| ZIF-22                      | 14a       | 50    | 0.30           | 7.20              | $1.70 \times 10^{-7}$                                                    |
| ZIF-78                      | 9S        | 25    | 0.38           | 9.50              | $0.97 \times 10^{-7}$                                                    |
| ZIF-90                      | 10S       | 200   | 0.35           | 7.30              | $2.37 \times 10^{-7}$                                                    |
| ZIF-95                      | 14d       | 25    | 0.37           | 8.48              | $5.05 \times 10^{-7}$                                                    |
| NH <sub>2</sub> -MIL-53     | 12c       | 15    | 0.75           | 30.9              | $1.98 \times 10^{-6}$                                                    |
| $\text{Cu}_3(\text{BTC})_2$ | 12a       | 40    | 0.90           | 13.5              | $4.10 \times 10^{-8}$                                                    |
| $\text{Cu}_3(\text{BTC})_2$ | 5b        | 25    | 0.90           | 4.60              | $6.74 \times 10^{-7}$                                                    |
| $\text{Cu}_3(\text{BTC})_2$ | 5c        | 25    | 0.90           | 6.84              | $1.06 \times 10^{-6}$                                                    |
| $\text{Cu}_3(\text{BTC})_2$ | This work | 20    | 0.90           | 7.05              | $6.52 \times 10^{-5}$                                                    |
|                             |           | 40    | 0.90           | 11.0              | $6.45 \times 10^{-5}$                                                    |

### Supporting References

- (1S) X. Yin, G. Zhu, Z. Wang, N. Yue, S. Qiu, *Microporous Mesoporous Mater.*, 2007, **105**, 156.
- (2S) C. Algieri, P. Bernardo, G. Golemme, G. Barbieri, E. Drioli, *J. Membr. Sci.*, 2003, **222**, 181.
- (3S) J. C. Poshusta, V. A. Tuan, J. L. Falconer, R. D. Noble, *Ind. Eng. Chem. Res.*, 1998, **37**, 3924.
- (4S) G. Guan, T. Tanaka, K. Kusakabe, K. Sotowa, S. Morooka, *J. Membr. Sci.*, 2003, **214**, 191.
- (5S) A. Huang, F. Liang, F. Steinbach, T. M. Gesing, J. Caro, *J. Am. Chem. Soc.*, 2010, **132**, 2140.
- (6S) H. Kalipcilar, T. C. Bowen, R. D. Noble, J. L. Falconer, *Chem. Mater.*, 2002, **14**, 3458.
- (7S) X. Gu, Z. Tang, J. Dong, *Microporous Mesoporous Mater.*, 2008, **111**, 441.
- (8S) Y. Li, F. Liang, H. Bux, A. Feldhoff, W. Yang, J. Caro, *Angew. Chem. Int. Ed.*, 2010, **49**, 548;
- (9S) X. Dong, K. Huang, S. Liu, R. Ren, W. Jin, Y. S. Lin, *J. Mater. Chem.*, 2012, **22**, 19222.
- (10S) A. Huang, W. Dou, J. Caro, *J. Am. Chem. Soc.*, 2010, **132**, 15562.
